# Supplementary material for: Machine Learning Early Prediction of Respiratory Syncytial Virus (RSV) in Pediatric Hospitalized Patients
Source: Research Square preprint supplement (doi:10.21203/rs.3.rs-1738979/v1), 2022-06-08
Supplement: Supplementary file 1 [file 0f37ecddd6b6a88d7c9a42a4.docx]

**Supplementary Materials**

**Supplementary Table 1. Parameters used in the final model**

| **Parameter** | **Value** |
| --- | --- |
| learning_rate | 0.1 |
| max_depth | 7 |
| n_estimators | 150 |
| reg_lambda | 0.5 |
| scale_pos_weight | 2 |
